# Supplementary material for: Two-dimensional single-crystal periodic macroporous ZnO sheets for extraordinary photocatalytic performance for antibiotics
Source: Royal Society of Chemistry journal article supplement (doi:10.1039/d4nr05058d), 2025-01-01
Supplement: d4nr05058d1.pdf [file d4nr05058d1.pdf]

## *Supporting Information*

# **Two-Dimensional Single-Crystal Periodic Macroporous ZnO Sheets for Extraordinary Photocatalytic Performance for Antibiotics**

Ling Zhou,<sup>‡a</sup> Yongjun Fu,<sup>‡a</sup> Manxing Mo,<sup>a</sup> Yihan Tong,<sup>a</sup> Ping Niu,<sup>c</sup> Junchao Wei,<sup>b</sup>  
Rongbin Zhang,<sup>a</sup> Ruihong Deng\* and Xuewen Wang<sup>\*a</sup>

<sup>a</sup>Key Laboratory of Jiangxi Province for Environment and Energy Catalysis, the School of Chemistry and Chemical Engineering, Nanchang University, 999 Xuefu Road, Nanchang, 330031, China

<sup>b</sup>School of Stomatology, Jiangxi Medical College, Nanchang University, Nanchang 330006, China

<sup>c</sup>School of Metallurgy, Northeastern University, Shenyang 110819, P. R. China

\*Corresponding authors:

Prof. Xuewen Wang, Email: [wangxuewen@ncu.edu.cn](mailto:wangxuewen@ncu.edu.cn); [dengreihong@ncu.edu.cn](mailto:dengreihong@ncu.edu.cn)

<sup>‡</sup>These authors contribute equally to this work.

## 2.1 Synthesis of Ordered PS Template

500 mL of deionized water and 2.5 g of polyvinylpyrrolidone (PVP) were added to a 1 L three-necked round-bottomed flask and vented with nitrogen for 30 min, followed by 65 mL of styrene after removing the inhibitor, and continued to be vented with nitrogen for another 20 min. The solution was heated to 75 °C and then stirring on, the polymerization reaction was initiated by the rapid addition of an aqueous solution of  $K_2S_2O_8$  (1 g  $K_2S_2O_8$  / 50 mL  $H_2O$ ) for 24 h. The resulting milky white dispersion was sonicated for 30 min and allowed to stand for 2 days. Then poured into a filtration funnel equipped with an organic filter membrane with a pore size of 0.2  $\mu m$ , and the negative pressure was controlled to be 0.05 Mpa. After 3 days of filtration, a solid cake was obtained, and the ordered PS template was successfully prepared after drying at 50 °C overnight.

## 2.3 Characterization and measurement

X-ray diffractometer (XRD, SmartLab9kw) patterns were obtained by a Rigaku diffractometer using Cu  $K\alpha$  radiation with a scanning speed of  $20^\circ \text{ min}^{-1}$  and a  $2\theta$  range of  $5-80^\circ$ . The morphology and surface states of all samples were studied by scanning electron microscopy (SEM, Hitachi, SU8100). The Electron paramagnetic resonance (EPR) spectra were measured with a Bruker EMX PLUS spectrometer at room temperature. The optical absorption of the samples was tested by UV-vis diffuse reflectance spectroscopy (UV-vis DRS, PerkinElmer Lambda 365). X-ray S2 photoelectron spectroscopy (XPS) was performed on an X-ray photoelectron

spectrometer (XPS, ESCALAB-250Xi) with an Al K $\alpha$  X-ray source. Due to the presence of surface critical carbon, all binding energies were calibrated by the C 1s photoelectron peak at 284.6 eV. Time-resolved photoluminescence (TRPL) spectroscopy was performed on an Edinburgh steady-state transient fluorescence spectrometer (FLS1000) with an excitation wavelength of 325 nm. The specific surface areas of the samples were tested by the Brunauer-Emmett-Teller (BET, Kubo-X1000). An electrochemical station (CHI-660) with a standard three-electrode configuration was used to test photocurrent profiles, electrochemical impedance spectroscopy (EIS), and other optoelectronic tests in a 0.1 M Na<sub>2</sub>SO<sub>4</sub> solution. Photocatalysts (ZnO-S and ZnO-H) were milled and coated on the FTO substrate for the electrode, and Pt sheets and saturated Ag/AgCl electrode were used as the working, counter and reference electrode, respectively. The surface area of the photoanode was 1 cm<sup>2</sup>. Electrochemical impedance spectroscopy (EIS) was performed at a bias potential of 1.8 V.

Photocatalytic degradation experiments. The photocatalytic activity of the 2DSPM ZnO sheets material was evaluated by degradation of the medical antibiotic pollutants ciprofloxacin (20 mg/L CIP), norfloxacin (30 mg/L NF), tetracycline (50 mg/L TC), phenol ( $4 \times 10^{-5}$  mol/L) and RhB ( $1 \times 10^{-5}$  mol/L) under UV-visible light. Specifically, 20 mg of photocatalyst was added to 100 mL of a solution configured with a certain concentration of pollutants and dispersed by sonication. Then, sampling was carried out at 6 min intervals over a 30 min dark treatment period to ensure that an adsorption-desorption equilibrium was reached. Subsequently, 5 ml of sample solution was taken at 20 min intervals under light, centrifuged and analyzed for contaminant

concentrations by UV-vis spectrophotometer.

Photoelectrochemical measurement. Electrochemical impedance spectra (EIS), Linear sweep voltammetry (LSV) curves and Mott-Schottky plots were measured using an electrochemical workstation (PARSTA T4000) with a three-electrode system using 0.1 M  $\text{Na}_2\text{SO}_4$  solution as electrolyte. In the system, Pt foil is the counter electrode and Ag/AgCl is the reference electrode. And, the working electrode was prepared by dip-coating the sample on FTO glass and heating it in an oven at 200 °C for 1 h.

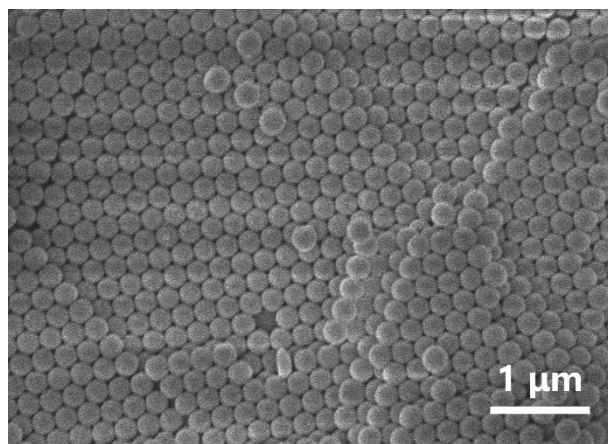

**Fig. S1.** SEM image of the PS template with a single sphere diameter of about 260 nm.

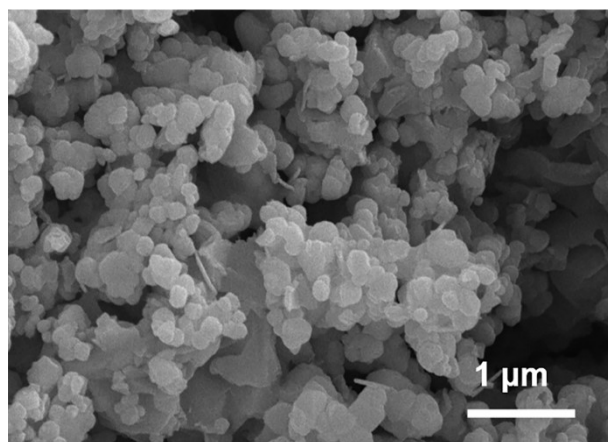

**Fig. S2.** SEM image of ZnO-R.

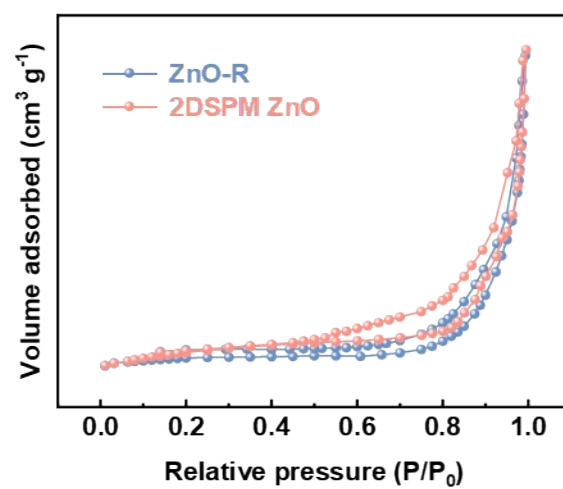

**Fig. S3.** N<sub>2</sub> adsorption-desorption isotherms for ZnO-R and 2DSPM ZnO.

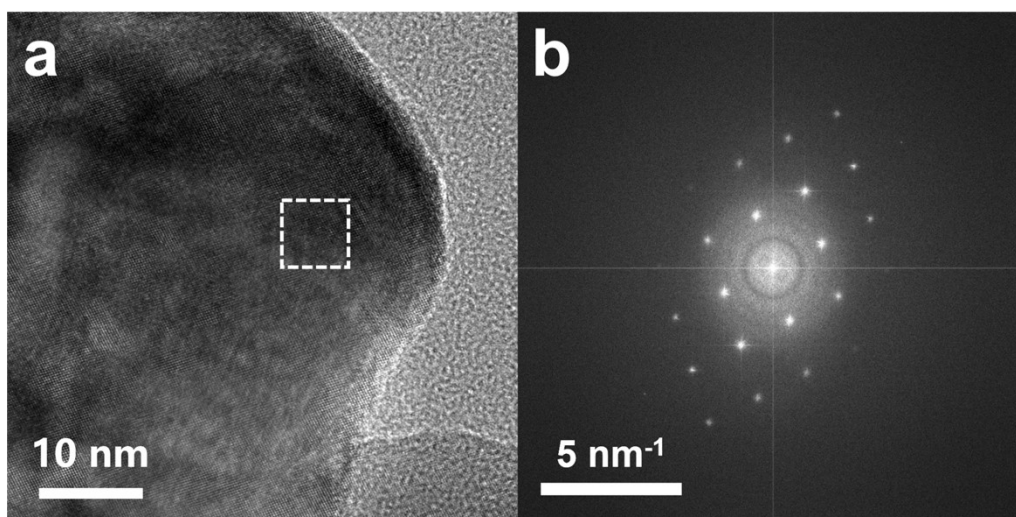

**Fig. S4.** (a) TEM image and (b) SAED pattern of another corresponding boxed area of 2DSPM ZnO.

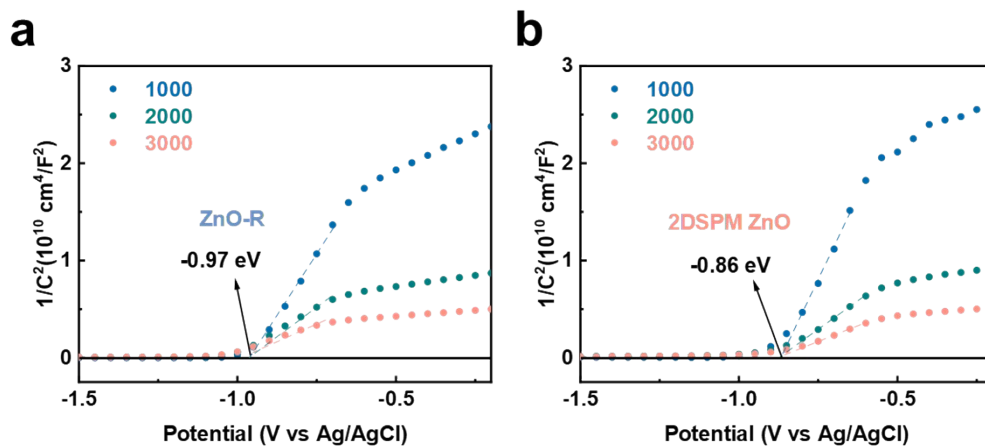

**Fig. S5.** Mott-Schottky curves of (a) ZnO-R and (b) 2DSPM ZnO relative to Ag/AgCl electrode at different frequencies.

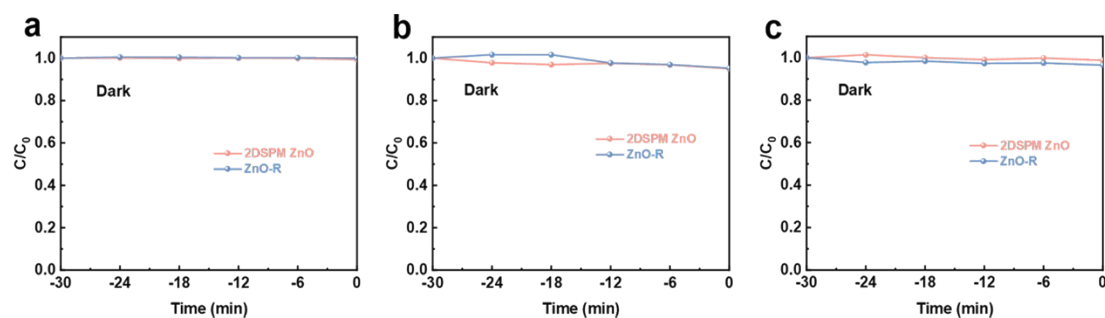

**Fig. S6.** Adsorption properties for CIP (a), NF (b) and TC (c) of 2DSPM ZnO and ZnO-R in the dark.

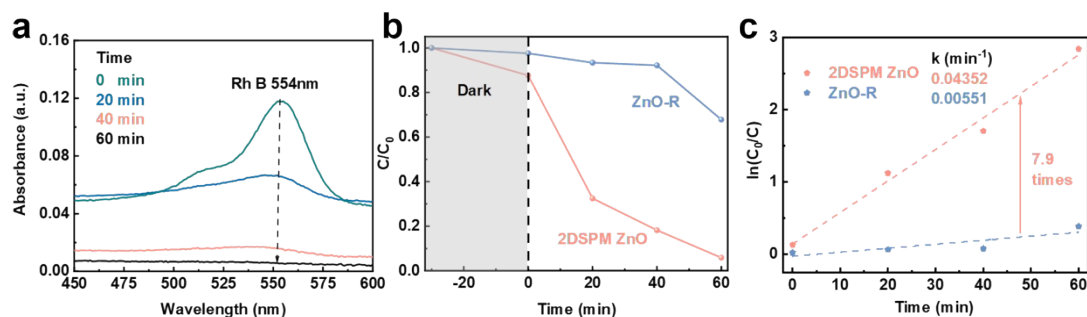

**Fig. S7.** (a) Light absorption curves of 2DSPM ZnO for RhB; (b) Photocatalytic degradation curves and (c) fitted curves of the degradation kinetic traces of RhB.

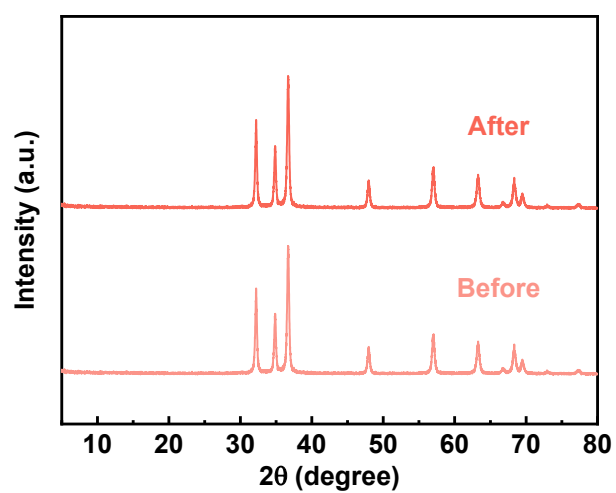

**Fig. S8.** XRD patterns before cycling and after cycling of 2DSPM ZnO.

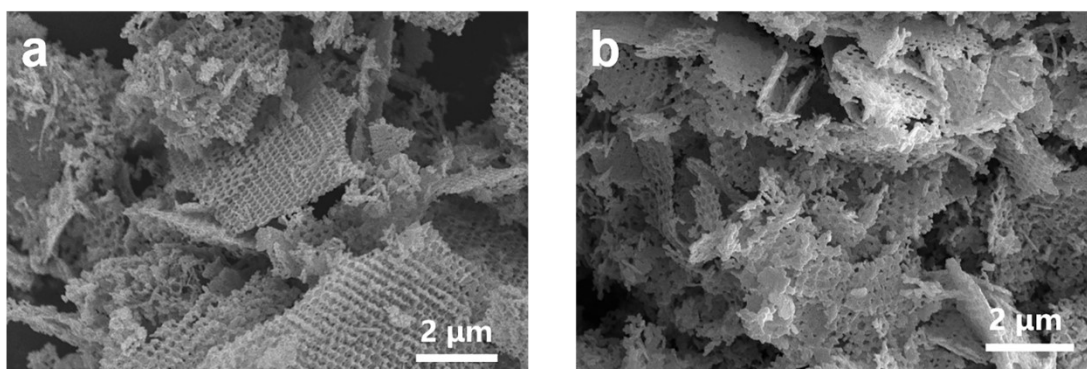

**Fig. S9.** SEM images of 2DSPM ZnO (a) before and (b) after the photocatalytic reaction.

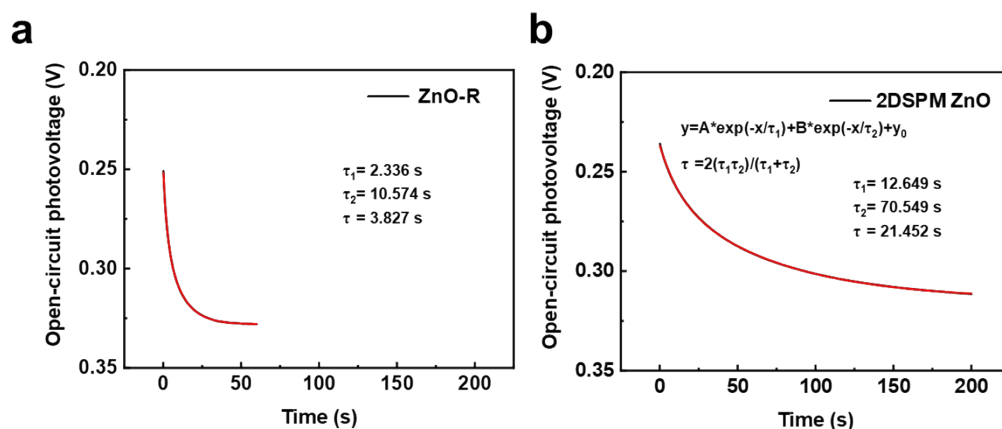

**Fig. S10.** Fitted curves for average carrier attenuation lifetimes of ZnO-R and 2DSPM ZnO.

**Table S1.** The specific surface area of ZnO-R and 2DSPM ZnO.

| Sample                                       | ZnO-R | 2DSPM ZnO |
|----------------------------------------------|-------|-----------|
| $S_{\text{BET}}/(\text{m}^2 \text{ g}^{-1})$ | 15.49 | 32.45     |

**Table S2.** Recent reports on the use of ZnO for CIP, NF, TC and phenol photodegradation.

| Material          | Light source | Application                                                                               | Ref.      |
|-------------------|--------------|-------------------------------------------------------------------------------------------|-----------|
| ZnO nanotubes     | UV-vis       | 6 mg/L CIP                                                                                | [1]       |
| ZnO nanoflowers   | UV-vis       | 6 mg/L CIP                                                                                | [2]       |
| ZnO nanoflowers   | UV-vis       | 5 mg/L NF                                                                                 | [3]       |
| ZnO               | UV-vis       | 5 mg/L TC                                                                                 | [4]       |
| ZnO nanoparticles | UV-vis       | $1 \times 10^{-5}$ M Phenol                                                               | [5]       |
| ZnO nanosheets    | UV-vis       | $1 \times 10^{-6}$ M RhB                                                                  | [6]       |
| 2DSPM ZnO sheets  | UV-vis       | 20 mg/L CIP 30 mg/L NF 50 mg/L TC<br>$4 \times 10^{-5}$ M Phenol $1 \times 10^{-5}$ M RhB | This work |

References:

- 1 C. Bojer, J. Schöbel, T. Martin, M. Ertl, H. Schmalz and J. Breu, *Appl. Catal. B-Environ.*, 2017, **204**, 561-565.



- 2 Y. Qu, X. Xu, R. Huang, W. Qi, R. Su and Z. He, *Chem. Eng. J.*, 2020, **382**, 123016.
- 3 S.-L. Zhou, S. Zhang, F. Liu, J.-J. Liu, J.-J. Xue, D.-J. Yang and C.-T. Chang, *J. Photoch. Photobio. A.*, 2016, **328**, 97-104.
- 4 L. Wang, Y. Zhu, T. Fu, K. Liu, J. Sun, J. Yan, L. Jiang, Z. Tong, Z. Zhou and H. Zhang, *Mater. Today Commun.*, 2023, **37**, 106967.
- 5 R. L. González, O. de la Fuente, R. L. García, M. del Carmen Uribe López, P. Q. Owen, M. C. H. López and M. A. A. Lemus, *J. Chem. Technol. Biot.*, 2023, **98**, 1826-1836.
- 6 R. Liu, X. Fu, Y. Guo, J. Zhang, W. Tian, *Vacuum*, 2023, **215**, 112337
